# Supplementary material for: An in situ crosslinked matrix enables efficient and mechanically robust organic solar cells with frozen nano-morphology and superior deformability
Source: Royal Society of Chemistry journal article supplement (doi:10.1039/d4ee02724h), 2024-01-01
Supplement: d4ee02724h1.pdf [file d4ee02724h1.pdf]

## Supplemental information

### **In-Situ Crosslinked Matrix enables Efficient and Mechanically Robust Organic Solar Cells with Frozen Nano-Morphology and Superior Deformability**

*Wei Song<sup>1,2</sup>, Zhenyu Chen<sup>1,2</sup>, Congqi Lin<sup>1,2</sup>, Pilan Zhang<sup>3</sup>, Dinghong Sun<sup>1,2</sup>, Weifu Zhang<sup>1,2</sup>, Jinfeng Ge<sup>1,2</sup>, Lin Xie<sup>1,2</sup>, Ruixiang Peng<sup>1,2\*</sup>, Daobin Yang<sup>1,2\*</sup>, Quan Liu<sup>1,2</sup>, Yifei Xu<sup>3</sup>, Ziyi Ge<sup>1,2\*</sup>*

<sup>1</sup>Zhejiang Engineering Research Center for Energy Optoelectronic Materials and Devices, Ningbo Institute of Materials Technology & Engineering, Chinese Academy of Sciences, Ningbo 315201, P. R. China

<sup>2</sup>Center of Materials Science and Optoelectronics Engineering, University of Chinese Academy of Sciences, Beijing 100049, P. R. China

<sup>3</sup>State Key Laboratory of Molecular Engineering of Polymers and Department of Macromolecular Science, Fudan University, Shanghai, China

\*Corresponding: pengrx@nimte.ac.cn, yangdaobin@nimte.ac.cn, geziyi@nimte.ac.cn

## Supplemental Experimental Procedures

### Materials

Donor monomer (4, 8-bis(5-(2-ethylhexyl)-3, 4-difluorothiophen-2-yl) benzo [1, 2-b: 4, 5-*b'*'] dithiophene-2, 6-diyl) bis (trimethylstannane) and acceptor monomer 5, 8-bis (5-bromo-4-(2-butyloctyl) thiophen-2-yl) dithieno [3', 2': 3, 4; 2'', 3'': 5, 6] benzo [1, 2-*c*] [1, 2, 5] thiadiazole were purchased from Nanjing Zhi yan Technology Co., Ltd.

The PM6, BTP-eC9 and PDINN were purchased from Solarmer Materials Inc. The molecular weight and dispersity of PM6 are Mn: 36kDa and PDI: 2.5-2.7, respectively. Toluene was purchased from Zhengzhou Alfa Chemical Co., Ltd., pyridine, chloroform was commercially available from China National Medicines Corporation Ltd. PEDOT: PSS (Clevios P VP 4083) was obtained from J&K Chemicals Inc. The indium-doped tin oxide (ITO) glass was purchased from Suzhou Shang yang Solar Technology Co., Ltd. All reagents were directly used without any further treatment, meanwhile, all of reactions were carried out under a nitrogen atmosphere.

### OSCs fabrication

Rigid device: The rigid device was fabricated with the conventional device structure of glass/ITO/4PADCB/Active layer/PDINN/Ag. The ITO-coated glass was cleaned with detergent and ultrasonicated in deionized water, acetone and ethyl alcohol for 20 min each. The cleaned ITO subsequently blow-dried by nitrogen and then treated by ultraviolet ozone for 35 minutes. The 4PADCB in ethanol solution was spin-cast onto the treated-ITO surface at 3000 rpm. for 30 s and then thermal annealing at 100 °C for 10 minutes in glove box. After annealing treatment, a chloroform solution containing the donors and acceptor was prepared to spin coating for fabricating active layer. The concentration of donor was 7 mg/mL with 0.3 wt.% 1,8-diiodooctane (DIO) and the D/A ratio was kept as 1:1.2. Subsequently, PDINN was dissolved in methyl alcohol solution (1 mg/mL) and spin-coated at 2000 rpm for 30 s. Finally, a 150 nm Ag electrode were deposited under the pressure of  $3 \times 10^{-5}$  Pa.

Flexible device: The flexible OSC was fabricated with the traditional sandwich structure: PEN/ITO/4PADCB/active layer /PDINN/Ag. To avoid distortion of the PEN by the spin coater, the ITO/PEN first was adhered onto a glass substrate of equal size by polydimethylsiloxane (PDMS) elastomer base, and then the normal spin coating process of the device is performed. The cleaned ITO/PET subsequently blow-dried by nitrogen and then treated by ultraviolet ozone for 35 minutes. The 4PADCB in ethanol solution was spin-cast onto the treated-ITO surface at 3000 rpm. for 30 s and then thermal annealing at 100 °C for 10 minutes in glove box. After that, the active layer and PDINN process conditions are the same as those of the rigid device. Finally, a 150 nm Ag electrode were deposited under the pressure of  $3 \times 10^{-5}$  Pa. The repeated bending cycle tests are performed by Mechanical Cyclic Deformation System.

### Characterization and Measurements

Elemental analyses were carried out using an Elementar elemental analyzer. Spectrophotometer (Perkin-Elmer Lambda 950) was taken to test the UV-vis absorption spectrums. Grazing incidence wide-angle X-ray scattering (GIWAXS) was measured to research the molecular packing, crystallinity, and mode direction of the films.

Photovoltaic performances of the OSCs were performed via the solar simulator (Newport-Oriel® Sol3A 450W). The intensity of the AM 1.5G spectra was calibrated by a certified standard silicon solar cell.

### Cyclic voltammetry (CV)

The energy levels for **D18-2F** were measured by cyclic voltammetry (CV) using a PC controlled 604E electrochemical workstation, which was performed by using Ag/AgCl as reference electrode in 0.1 mol L<sup>-1</sup> tetra-*n*-butylammonium hexafluorophosphate (n-Bu<sub>4</sub>NPF<sub>6</sub>) solution, and ferrocene/ferrocenium (Fc/Fc<sup>+</sup>) (-0.1 eV versus Ag/AgCl) was used as internal reference. The CV system was constructed using a Pt disk as the working electrode, a Pt wire as the counter electrode, and an Ag/AgNO<sub>3</sub> (0.1 mol L<sup>-1</sup> in acetonitrile) electrode as the reference electrode. The HOMO and LUMO were

calculated according to the following equations:

$$E_{HOMO/LUMO} = -(\varphi_{ox/red} - \varphi_{Fc/Fc^+} + 4.8) \text{ eV}$$

Where  $\varphi_{ox}$  is the onset of oxidation and the  $\varphi_{red}$  relates to the reduction potential, respectively.

### Peak force quantitation nanomechanical mapping (PFQNM) characterizations

The Derjaguin-Muller-Toporov (DMT) modulus, adhesion, deformation, and atomic force microscope (AFM) images were obtained from PFQNM and tapping mode by a Veeco Dimension 3100V atomic force microscope.

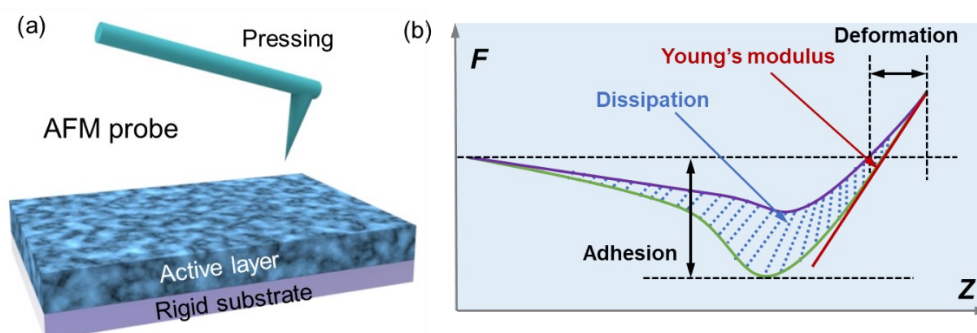

**Figure S1.** (a) Schematic diagram of the AFM PFQNM technology. (b) Schematic diagram of a full force-distance curve. The Young's modulus can be extracted by extrapolating the linear portion of the retraction curve after the contact point. The adhesion is the vertical distance between the base line and the bottom most part of the retraction curve.

### Pseudo free-standing tensile test

Stress-strain curves were tested on in-situ micro-mechanical testing system (**PR-MMT6SL-100F**, Shenzhen HuaJason Technologies, Co., LTD.). The films were spin-casted onto the PEDOT: PSS (4083)-coated glass substrate at first, and then cut into long strips approximately 5 mm wide and 20 mm long to assemble the sample. Afterward, the films were floated onto the water surface, and attached to the grips by van der Waals forces. The strain was applied at a fixed strain rate, and the tensile load values were measured by a load cell with high resolution.

### ***In-situ* ultraviolet-visible (UV-vis) absorption**

In-situ UV-vis absorption measurements were performed by the Filmetrics F20-EXR spectrometer using the transmission mode with a time resolution of 0.1 s.<sup>1</sup> The spectrometer consists of a light source and detector. The light source and detector are fixed above and below the substrate, respectively, and on the same vertical line. The solution was injected into the slot, and the film was coated onto the glass substrate. The detector collects the transmission spectra ranging from 400 to 1050 nm during coating. The UV-vis absorption spectra are calculated from the transmission spectra according to the equation  $A_{\lambda} = -\log_{10}(T)$ , where  $A_{\lambda}$  is the absorbance at a certain wavelength ( $\lambda$ ), and T is the calculated transmittance. The light source and detector were turned on before coating the film, so time zero is the point when the first solution transmission spectrum was collected by the detector. Before time zero, there is only noise in the transmission spectra.

The authors thank Dr. Bin Hu (Xi'an Jiaotong University) for assistance with data acquisition.

### ***In-situ* photoluminescence spectra**

In-situ Photoluminescence Spectra Measurements were performed by a laser device (MGL-III-785-300mW BH81223) with a time resolution of 0.1 s.

The authors thank Dr. Bin Hu (Xi'an Jiaotong University) for assistance with data acquisition.

### **Cryogenic transmission electron microscopy (cryo-TEM)**

For sample preparation, 6  $\mu$ L solution was dropped on a Cu Quantifoil holey carbon grid, and the excess solution was blotted for 1 s by a filter paper. Then, the grid was immediately plunged into liquid ethane with ThermoFisher Vitrobot<sup>TM</sup> Mark IV (4°C and 20% humidity). Next, the grid was transferred into a JEOL CryoARM cryo-TEM equipped with a cold field emission gun operating at 300 kV, an Omega energy filter, and a Gatan K3 direct electron detector. Images were recorded with a defocus value of  $\sim$ 3  $\mu$ m.

The authors thank Dr. Xiaoyue Hu (State Key Laboratory of Molecular Engineering of Polymers and Department of Macromolecular Science, Fudan University) for assistance with data acquisition.

### Space charge limited current measurements (*SCLC*)

The carrier mobilities were measured by SCLC method. The electron-only devices were fabricated in a structure of ITO/Al/active layer/PDINN/Ag, whereas hole-only devices were fabricated utilizing a structure of ITO/PEDOT:PSS/active layer/MoO<sub>3</sub>/Ag. The charge mobilities were determined by fitting the dark current measurement curves according to the Mott-Gurney law:

$$J_{SCLC} = \frac{9}{8} \varepsilon_0 \varepsilon_r \mu \frac{V^2}{L^3}$$

where  $J_{SCLC}$  is the current density,  $\varepsilon_0$  is the permittivity of free space ( $8.85 \times 10^{-14}$  F/cm),  $\varepsilon_r$  is the relative dielectric constant of the BHJ systems ( $\sim 3$  for conjugated polymers),  $\mu$  is the charge mobility.  $L$  is the thickness of the active layer, and  $V$  is the applied voltage in OSCs.

### Contact angle measurement

Contact angles were measured from spin-coated films by an optical contact angle meter (CAM 200). The surface energy was estimated by the Harmonic mean equations:

$$(1 + \cos \theta_1) \gamma_1 = 2(\gamma_1^d \gamma_s^d)^{\frac{1}{2}} + 2(\gamma_1^p \gamma_s^p)^{\frac{1}{2}}$$

$$(1 + \cos \theta_2) \gamma_2 = 2(\gamma_2^d \gamma_s^d)^{\frac{1}{2}} + 2(\gamma_2^p \gamma_s^p)^{\frac{1}{2}}$$

$$\gamma_s = \gamma_s^d + \gamma_s^p$$

where  $\gamma_s^d$  represents the dispersive components,  $\gamma_s^p$  is the polar component,  $\gamma_s$  is the surface energy.  $\theta_1$  and  $\theta_2$  are the contact angles of pure water and glycerol, respectively.

H<sub>2</sub>O:  $\gamma_1 = 72.8 \text{ mJ/m}^2$ ,  $\gamma_1^d = 21.8 \text{ mJ/m}^2$ ,  $\gamma_1^p = 51.0 \text{ mJ/m}^2$ .

Diiodomethane:  $\gamma_2 = 50.8 \text{ mJ/m}^2$ ,  $\gamma_2^d = 48.5 \text{ mJ/m}^2$ ,  $\gamma_2^p = 2.3 \text{ mJ/m}^2$ .

## Supplemental Figures and Tables

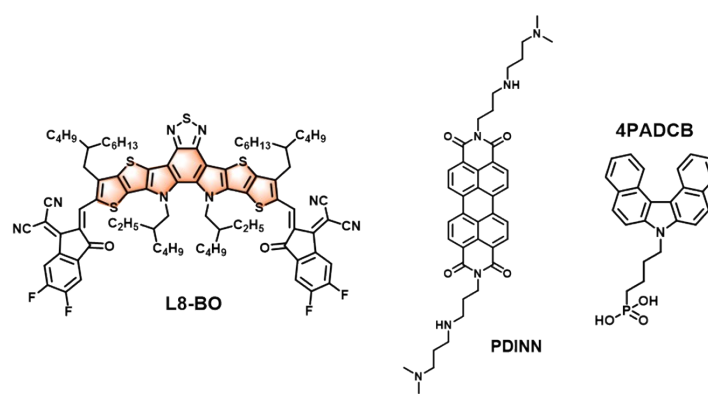

**Figure S2.** Molecular structure of L8-BO, PDINN and 4PADCB.

## The synthetic route of D18-2F

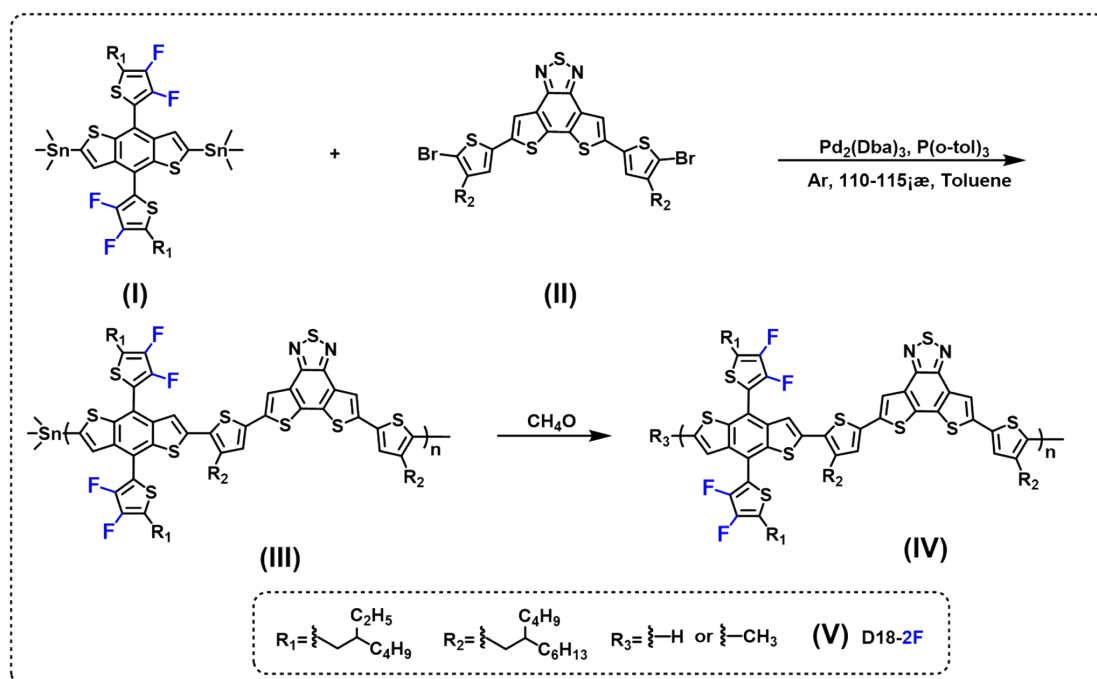

**Scheme S1.** The synthetic route of **D18-2F**.

**Monomer (I):** (4, 8-bis(5-(2-ethylhexyl)-3, 4-difluorothiophen-2-yl) benzo [1, 2-b: 4, 5-b'] dithiophene-2, 6-diyl) bis (trimethylstannane), molecular weight ( $M_w$ ): 976.53 kg mol<sup>-1</sup>, <sup>1</sup>H NMR (CDCl<sub>3</sub>): δ 7.41 (d,  $J$  = 2.1 Hz, 2H), 2.79 (dd,  $J$  = 7.0, 3.0 Hz, 4H), 1.71 – 1.67 (m, 2H), 1.50 (d,  $J$  = 24.0 Hz, 4H), 1.35 (d,  $J$  = 6.6 Hz, 12H), 0.97 – 0.92 (m, 12H), 0.42 (s, 18H).

**Monomer (II):** 5, 8-bis (5-bromo-4-(2-butyldecyl) thiophen-2-yl) dithieno [3', 2': 3, 4; 2'', 3'': 5, 6] benzo [1, 2-c] [1, 2, 5] thiadiazole,  $M_w$ : 907.02, <sup>1</sup>H NMR (400 MHz, CDCl<sub>3</sub>): <sup>1</sup>H NMR (400 MHz, CDCl<sub>3</sub>) δ 7.87 (s, 2H), 6.96 (s, 2H), 2.51 (d,  $J$  = 7.2 Hz, 4H), 1.31 (d,  $J$  = 12.0 Hz, 33H), 0.91 (d,  $J$  = 8.8 Hz, 12H).

**Synthesis of polymer donor (IV) D18-2F: Monomer (I)** (100 mg, 0.1027 mmol), **monomer (II)** (93.17 mg, 0.1027 mmol), additive **Pd<sub>2</sub>(Dba)<sub>3</sub>** (10 mg, 0.0109 mmol) and additive **P(o-tol)<sub>3</sub>** (10 mg, 0.03285 mmol) were dissolved in Toluene (1.5 ml) and stirred at 110°C for 10 h under nitrogen atmosphere. The solvent was removed under vacuum after the reaction mixture was cooled to ambient temperature and Settled in methanol. Afterward, D18-2F was purified through Soxhlet extraction, followed by acetone, methanol, dichloromethane, chloroform, and chlorobenzene. Finally, the components in chlorobenzene were collected and settled in methanol. The components in chlorobenzene were finally collected and settled in methanol. After overnight drying in a vacuum drying oven, a brownish yellow target product (131.36 mg, 68 % yield) was obtained. <sup>1</sup>H NMR (CDCl<sub>3</sub>): δ = 7.52 (br, aromatic protons), 7.00 (br, aromatic protons), 6.38 (br, aliphatic protons), 3.00 (br, aliphatic protons), 1.26 - 0.55 (br, aromatic protons).

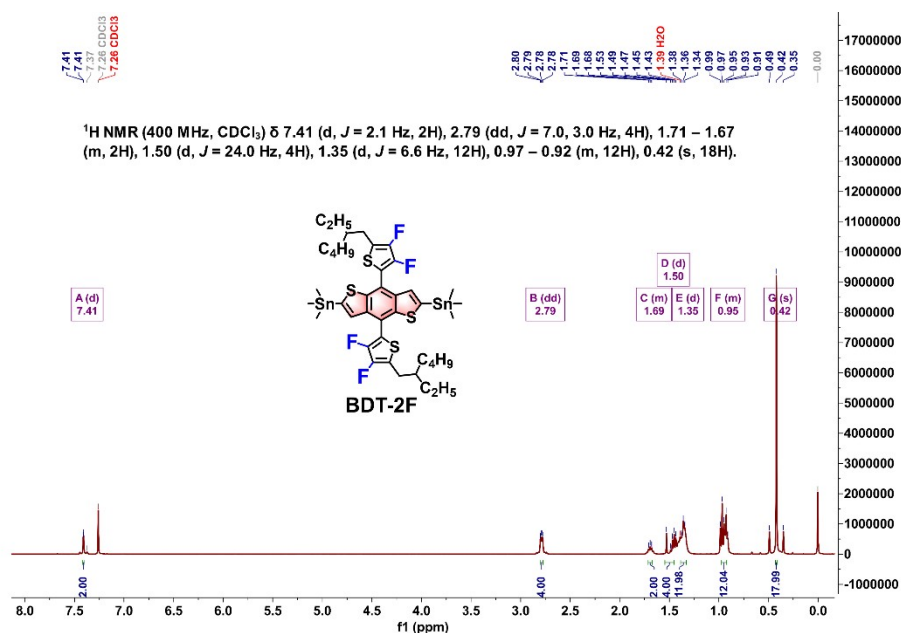

**Figure S3.** <sup>1</sup>H-NMR spectrum of **monomer (I)** in chloroform-*d*.

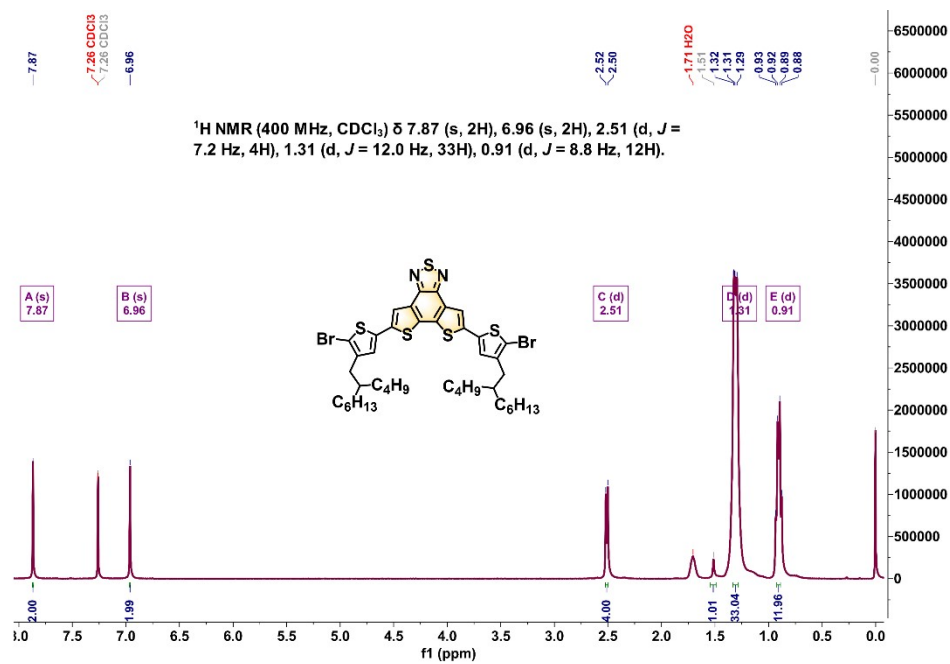

Figure S4. <sup>1</sup>H-NMR spectrum of monomer (II) in chloroform-*d*.

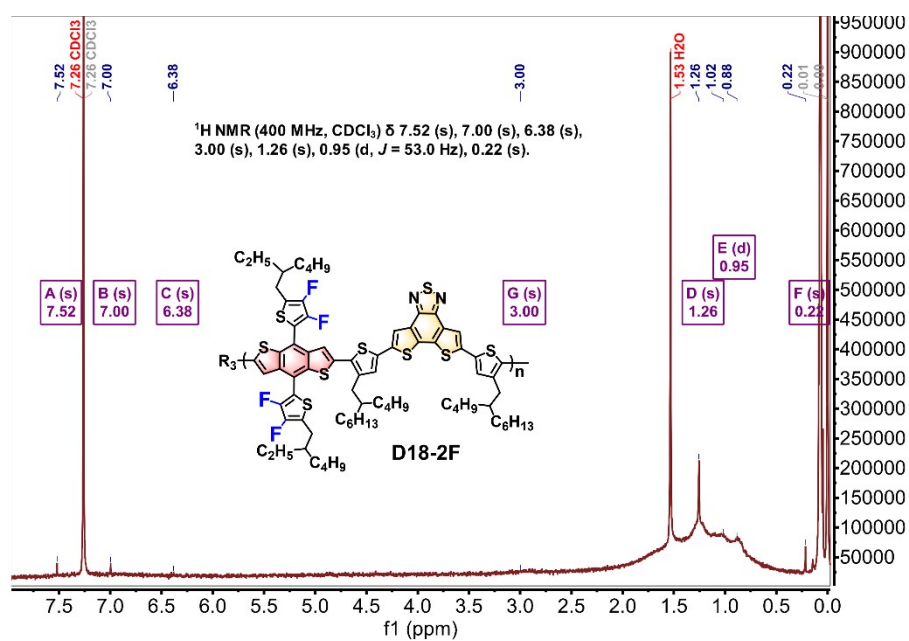

**Figure S5.**  $^1\text{H}$ -NMR spectrum of **polymer donor (IV)** D18-2F in chloroform-*d*.

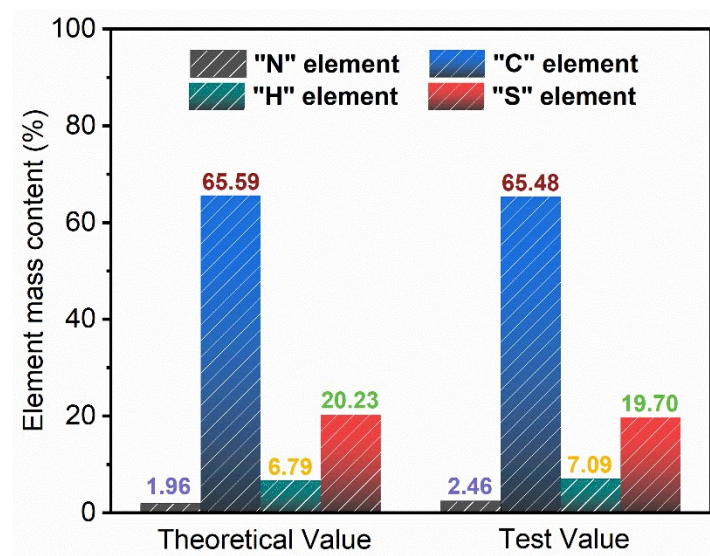

**Figure S6.** Elemental analysis characterization for **D18-2F**.

## 1. DFT theoretical calculations

The detailed theoretical calculations of **D18-2F** based on DFT theory at B3LYP/6-31G (d, p) level.

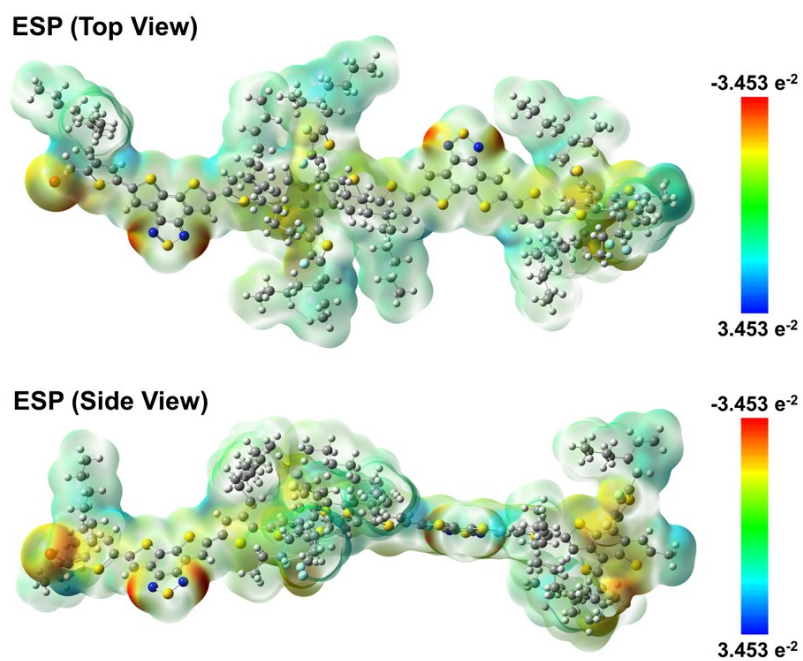

**Figure S7.** ESP distribution of **D18-2F**.

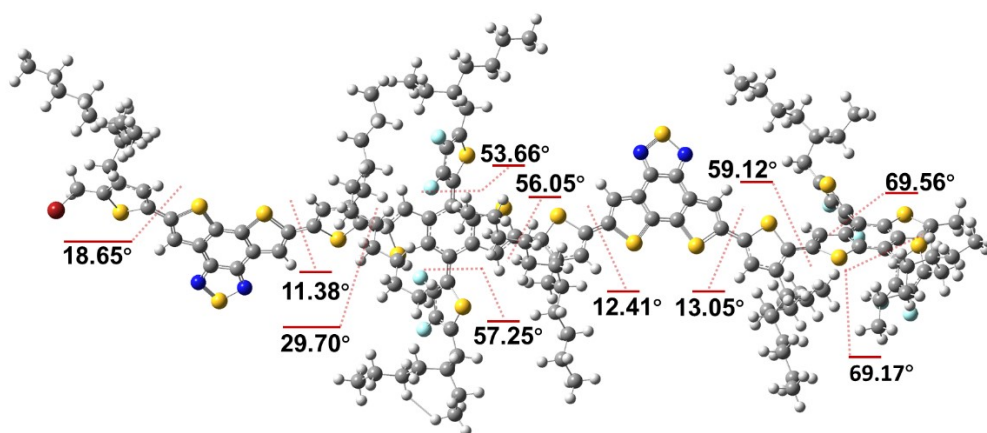

**Figure S8.** The twist dihedral angles of **D18-2F**.

**HOMO = -5.06 eV**  
**(Top View)**

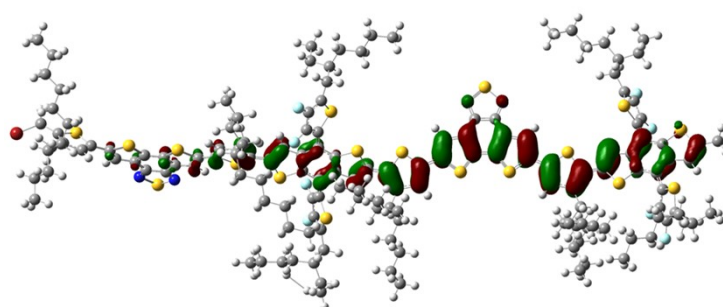

**(Side View)**

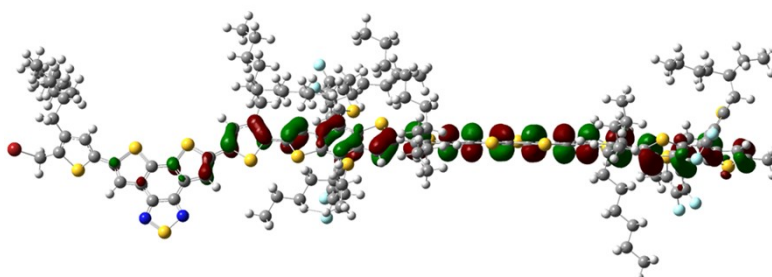

**Figure S9.** HOMO energy levels of D18-2F in top and side view.

**LUMO -2.53 eV  
(Top View)**

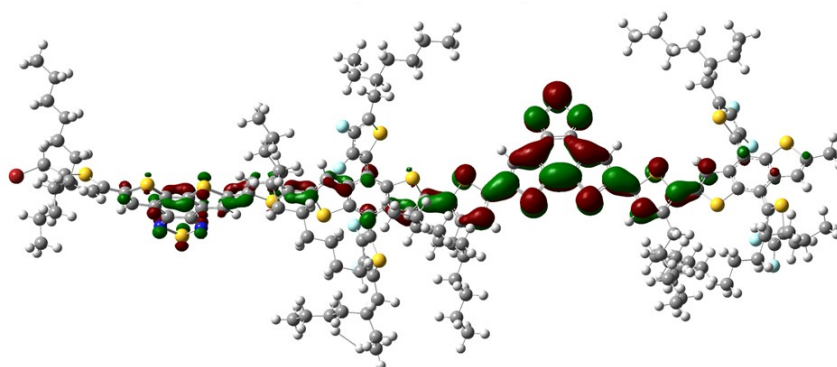

**(Side View)**

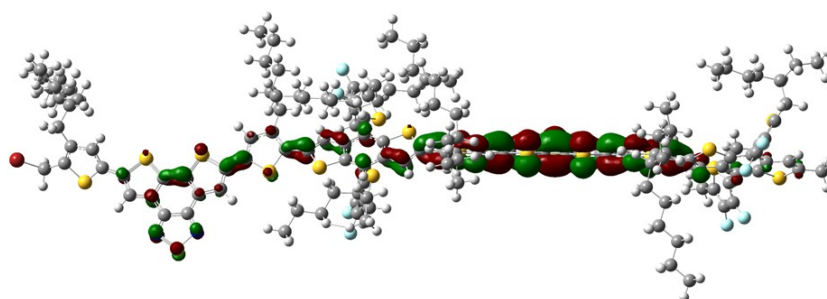

**Figure S10.** LUMO energy levels of D18-2F in top and side view.

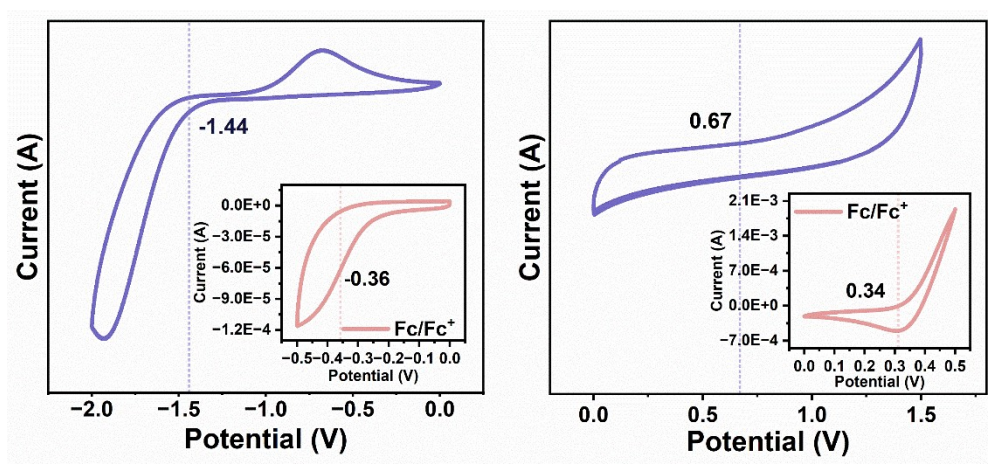

**Figure S11.** Electrochemical cyclic voltammetry curves of D18-2F.

### GPC characterization

The  $M_n$ ,  $M_w$  and PD were acquired on 1260 HT Infinity II in chloroform, with the solution of  $3^{-1} \text{ mg ml}^{-1}$ .

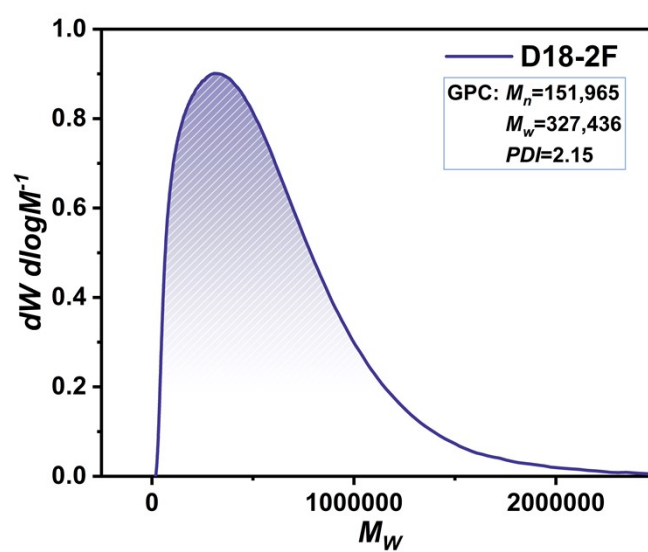

**Figure S12.** GPC test for D18-2F.

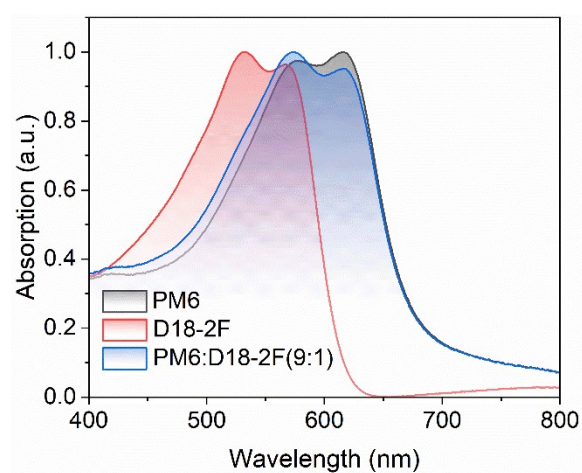

**Figure S13.** Normalized UV/Vis absorption spectra of PM6, D18-2F, and PM6:D18-2F (9:1) in films.

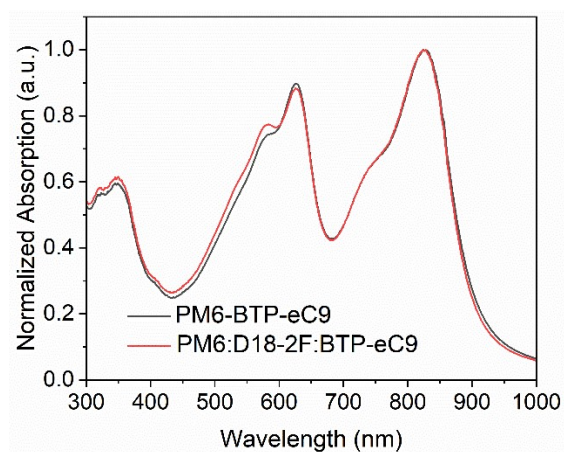

**Figure S14.** The normalized absorption of the PM6:BTP-eC9 and PM6:D18-2F:BTP-eC9 (0.9:0.1:1.2) on quartz substrate.

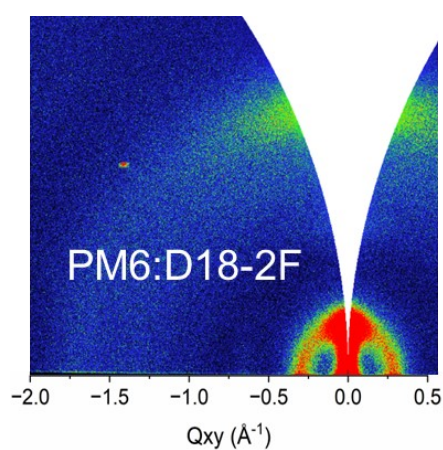

**Figure S15.** 2D GIWAXS characterization for PM6:D18-2F (9:1) films.

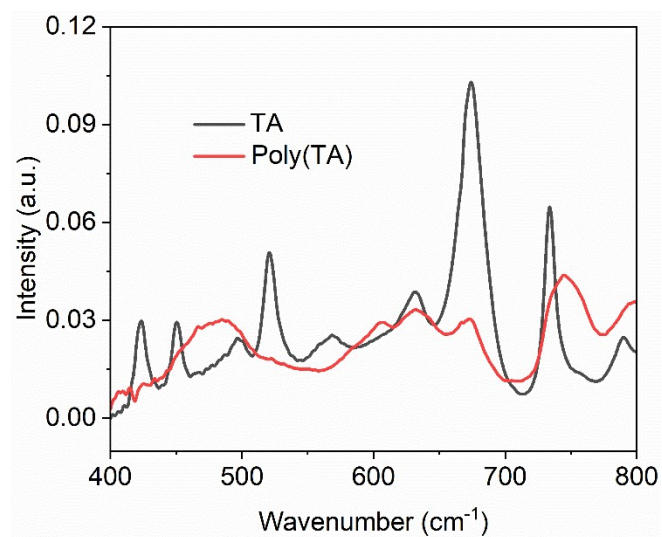

**Figure S16.** Fourier transform infrared (FTIR) spectra TA and TA heating at 60°C.

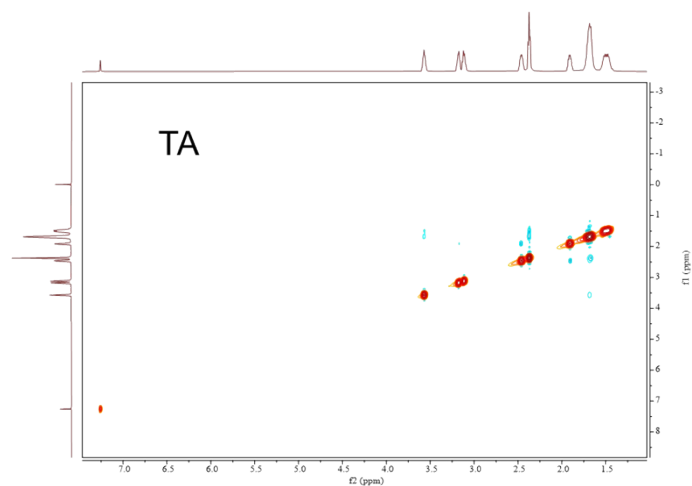

**Figure S17.** 2D <sup>1</sup>H-<sup>1</sup>H NMR spectra of TA in CDCl<sub>3</sub> solutions.

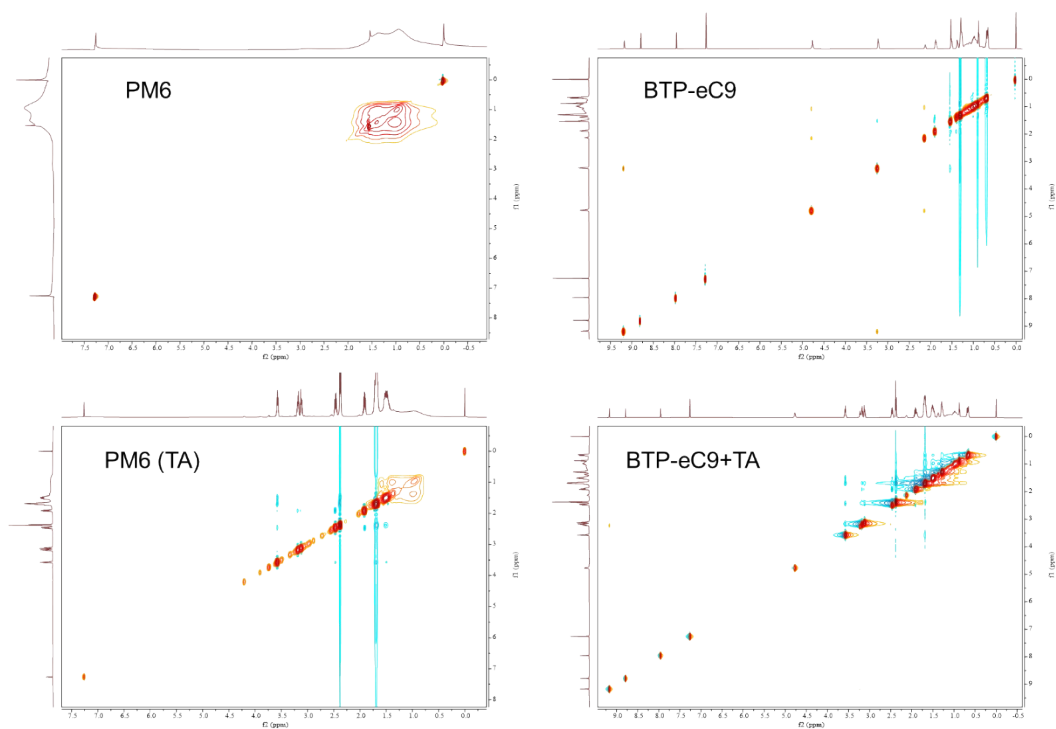

**Figure S18.** 2D  $^1\text{H}$ - $^1\text{H}$  NMR spectra of PM6, TA-doped PM6, BTP-eC9 and TA-doped BTP-eC9 in  $\text{CDCl}_3$  solutions. The weight ratios were set as PM6:TA = 1:1, BTP-eC9:TA = 1:1.

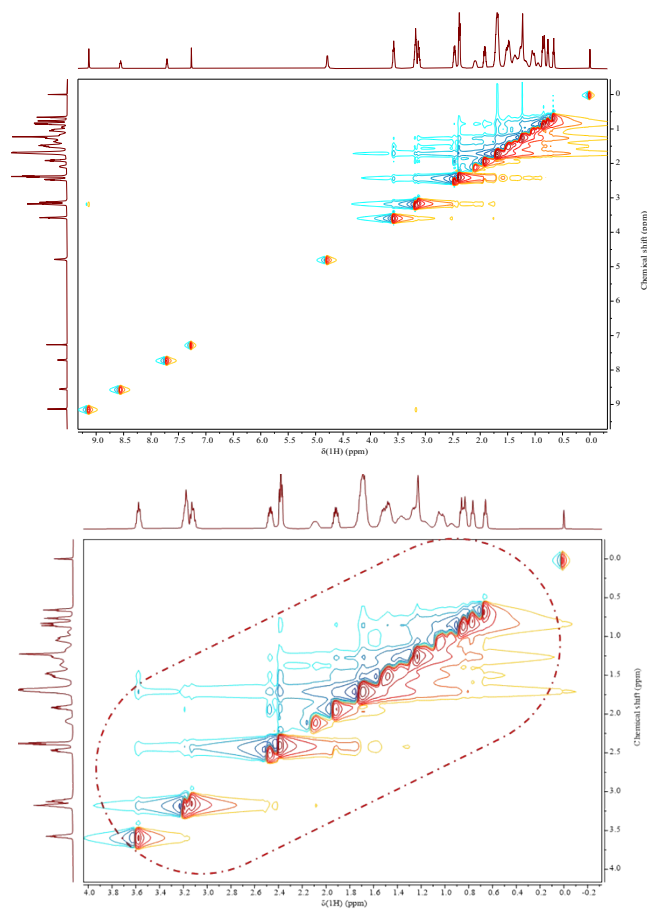

**Figure S19.** 2D  $^1\text{H}$ - $^1\text{H}$  NMR spectra of L8-BO and TA-doped L8-BO in  $\text{CDCl}_3$  solutions. The weight ratios were set as, L8-BO:TA = 1:1.

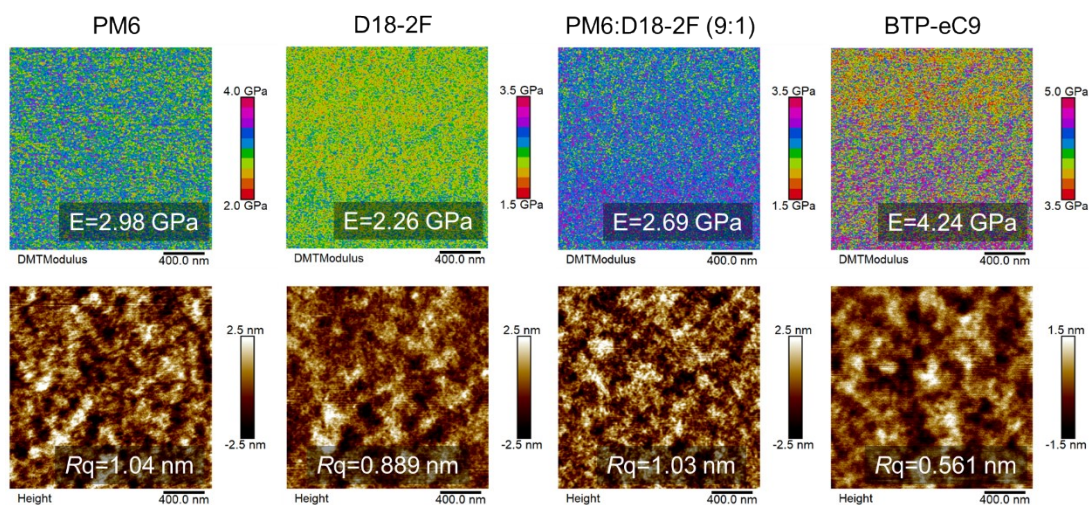

**Figure S20.** Derjaguin–Muller–Toporov (DMT) modulus and height images of PM6, D18-2F, PM6:D18-2F (9:1) and BTP-eC9 film.

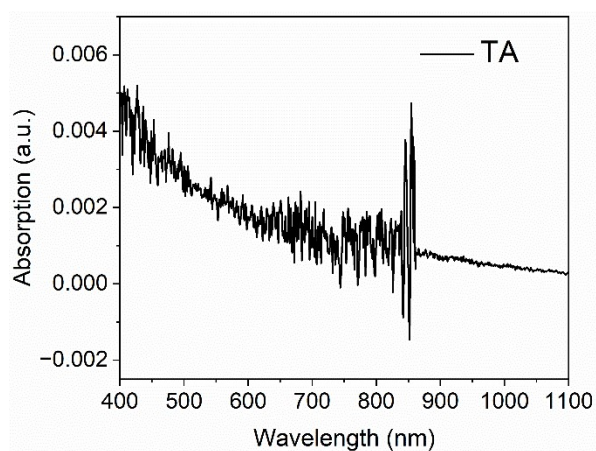

**Figure S21.** The optical absorption of the TA on quartz substrate.

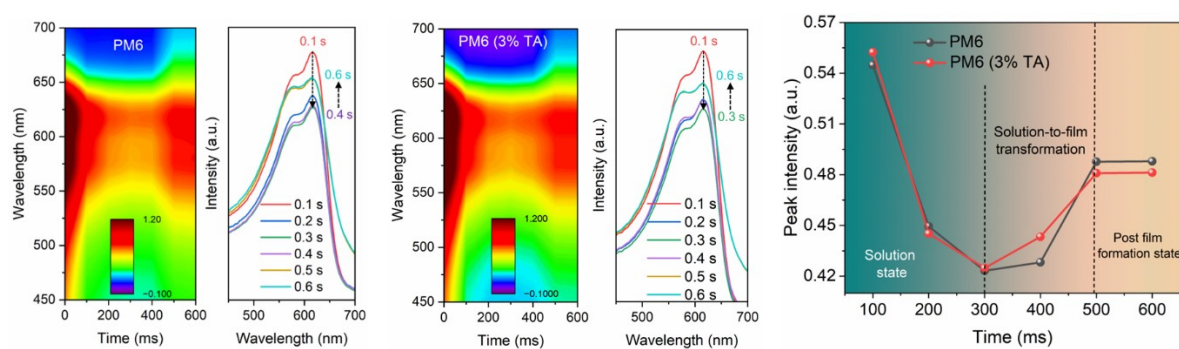

**Figure S22.** (a and b) The color mapping of *in-situ* UV-vis reflectance spectra as a function of spin-coating time, and *in-situ* UV-vis spectra during the first 0.6 s of spin coating process. (c) Normalized *in-situ* absorption intensity at the peak location of corresponding to acceptor films.

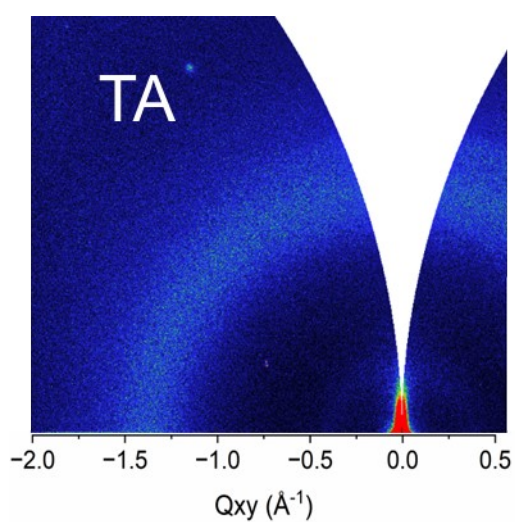

**Figure S23.** 2D GIWAXS characterization for TA films.

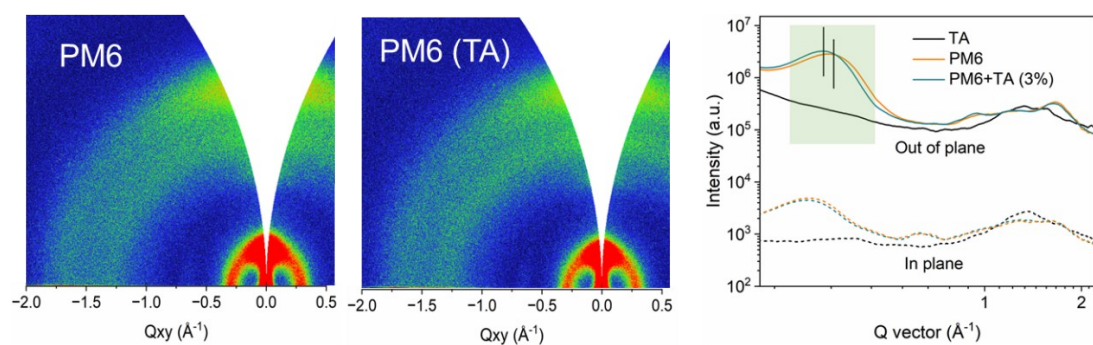

**Figure S24.** (a and b) 2D GIWAXS characterization for PM6 and TA-doped PM6 films. (c) 1D X-ray profiles along the OOP and IP linecut profiles of the 2D GIWAXS patterns of corresponding to films.

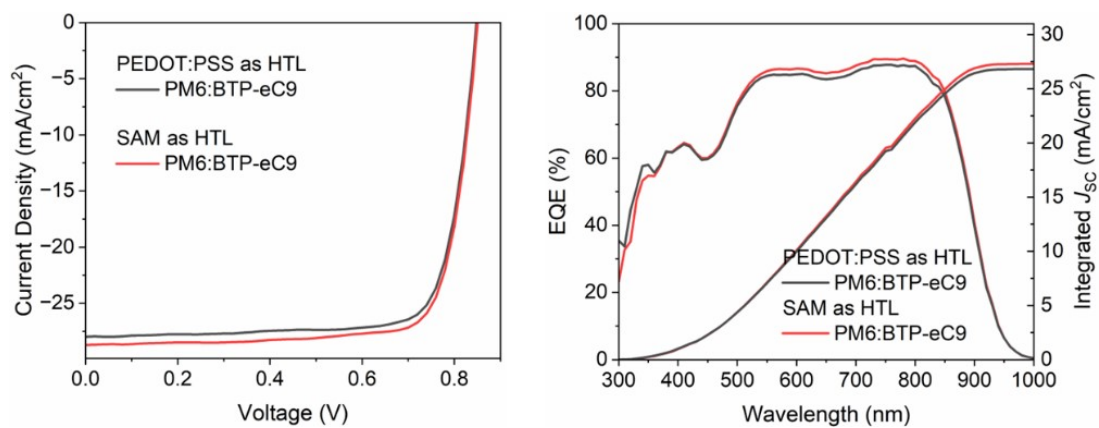

**Figure S25.** (a)  $J$ - $V$  curves of the rigid devices fabricated with PM6:BTP-eC9 with PEDOT:PSS and SAM as hole transport layer. (b) EQE curves of the corresponding devices.

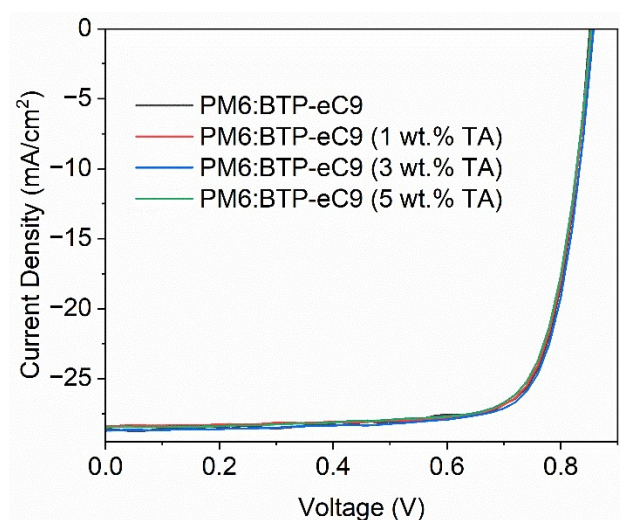

**Figure S26.**  $J$ - $V$  curves of the PM6:BTP-eC9-based devices doped with different concentrations of TA.

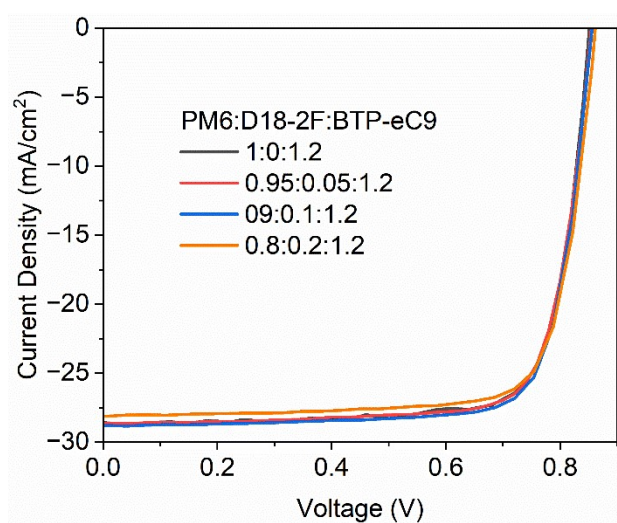

**Figure S27.**  $J$ - $V$  curves of the PM6:D18-2F:BTP-eC9-based devices by varying the blending ratio of D18-2F.

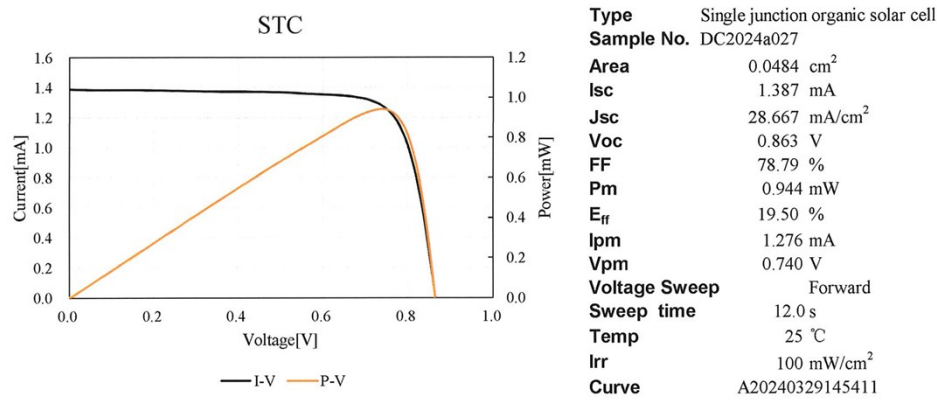

— End of Report —

**Figure S28.** PCE certified at Institute of Electrical Engineering, Chinese Academy of Sciences, showing an efficiency of 19.50% (Report No: PWQC-WT-P24032522-2R).

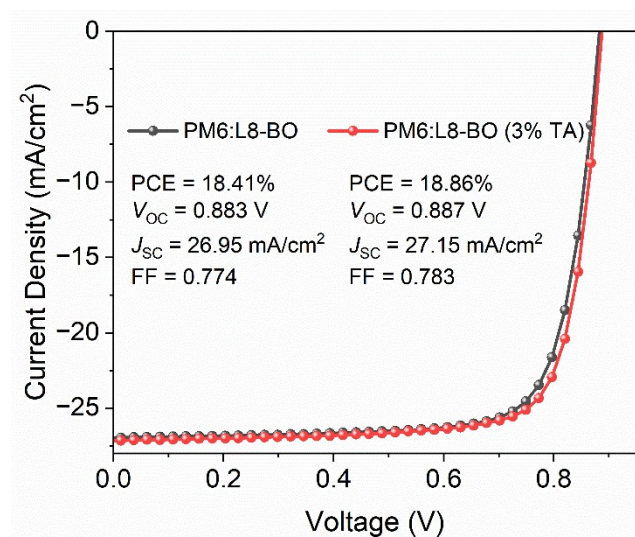

**Figure S29.**  $J$ - $V$  curves of the PM6:L8-BO and 3 wt.% TA-doped PM6:L8-BO-based devices fabricated with PEDOT:PSS as hole transport layer.

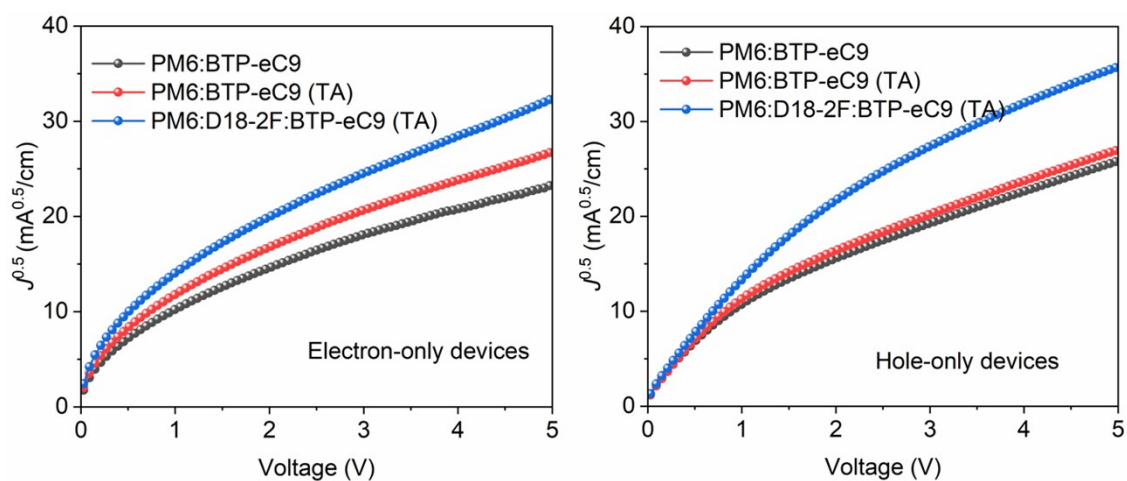

**Figure S30.** The electron ( $\mu_e$ ) and hole ( $\mu_h$ ) mobilities of the devices.

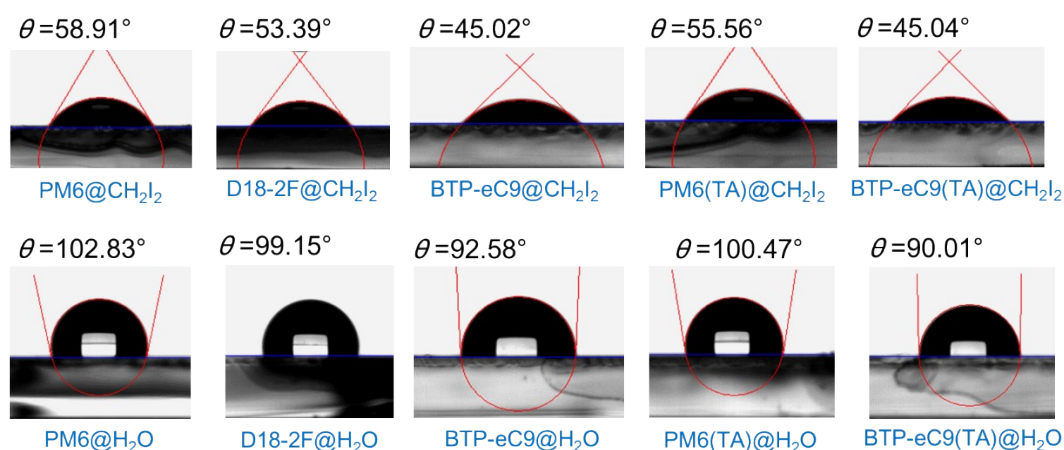

**Figure S31.** Contact angles of PM6, D18-2F, BTP-eC9, PM6 (TA) and BTP-eC9 (TA) thin films by applying deionized water ( $\text{H}_2\text{O}$ ) and diiodomethane (DIM) liquid drops.

To determine the compatibility and miscibility of D18-2F, as shown in **Figure S30** and **Table S7**, the contact angles (CA) of water and diiodomethane liquid drops were evaluated. The corresponding surface energies ( $\gamma$ ) were calculated using the Owens-Wendt-Rabel-Kaelble method. The  $\gamma$  values of PM6, D18-2F, and BTP-eC9 were  $29.778 \text{ mN m}^{-1}$ ,  $32.809 \text{ mN m}^{-1}$ , and  $37.141 \text{ mN m}^{-1}$  respectively. In addition to similar surface energies, PM6 and D18-2F exhibit strong miscibility, as indicated by  $\chi$  values ( $0.134\kappa \text{ K}$  for D18-2F/BTP-eC9 and  $0.073\kappa \text{ K}$  for D18-2F/PM6), indicating that they

can form well-mixed donors.

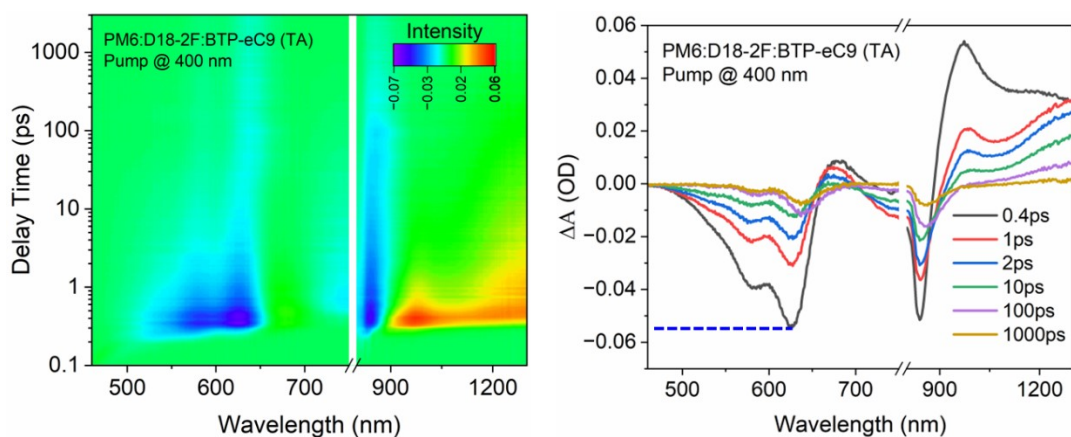

**Figure S32.** (a) 2D transient absorption image of the TA-doped PM6:D18-2F:BTP-eC9 with 400 nm excitation. (b) Absorption spectrum of corresponding to blend films at indicated delay times.

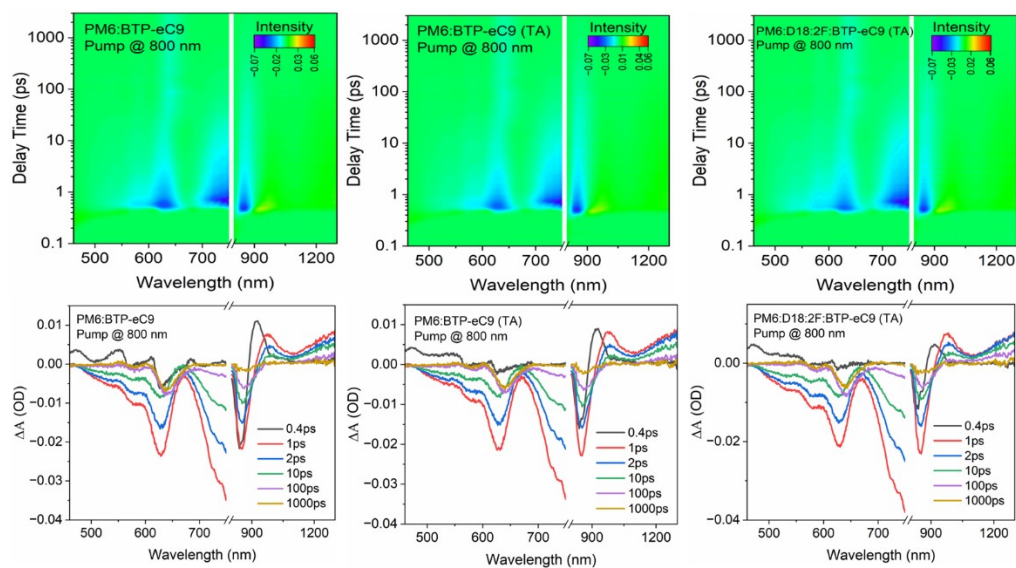

**Figure S33.** (a) 2D transient absorption image of the blend films with 800 nm excitation. (b) Absorption spectrum of corresponding to blend films at indicated delay times.

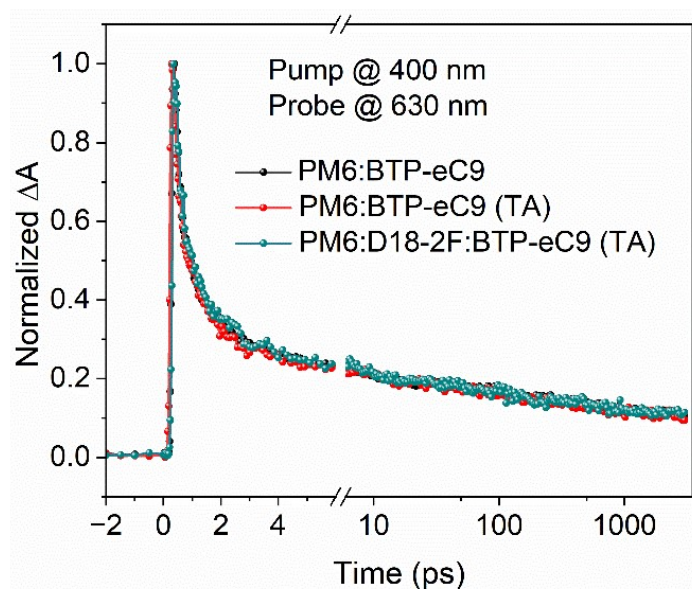

**Figure S34.** Decay kinetics of corresponding to blend films at 630 nm wavelength.

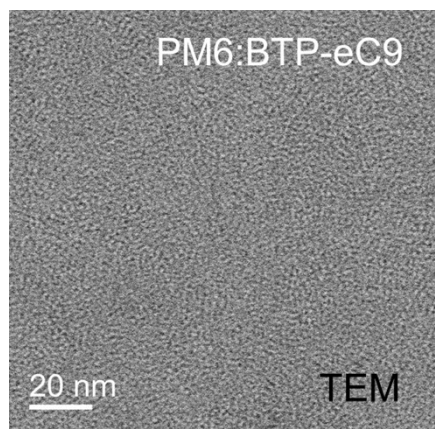

**Figure S35.** High-resolution TEM images of the PM6:BTP-eC9 films.

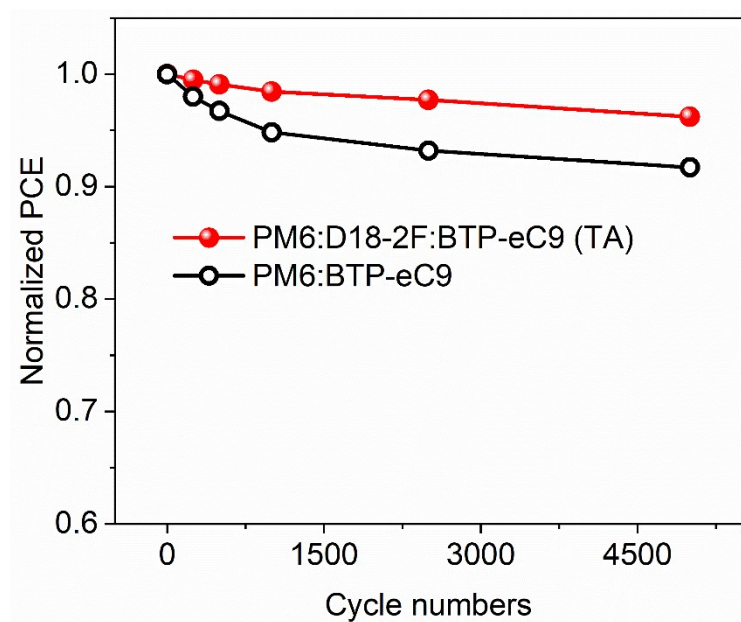

**Figure S36.** Decays of normalized PCEs of flexible devices in a continuous bending test.

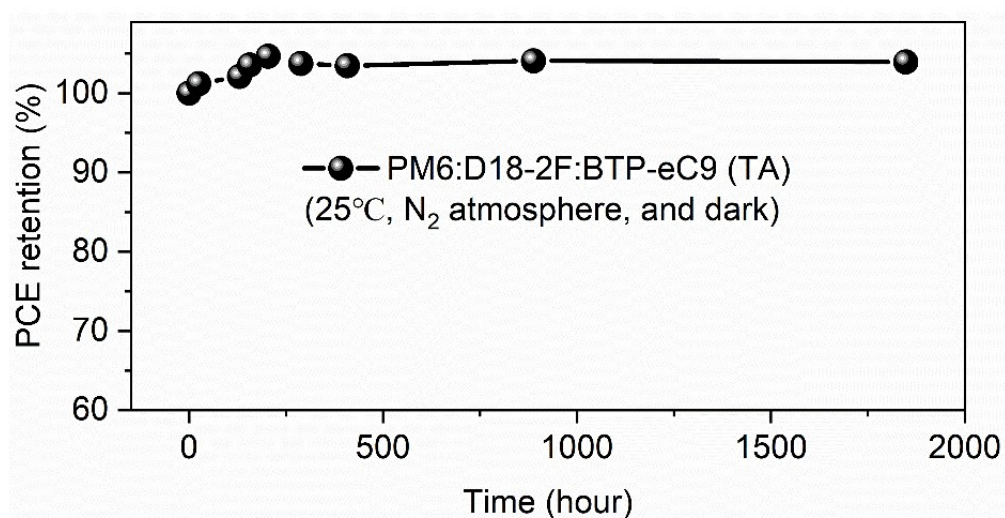

**Figure S37.** Shelf storage lifetime of inverted devices without encapsulation (25°C, N<sub>2</sub> atmosphere, and dark conditions).

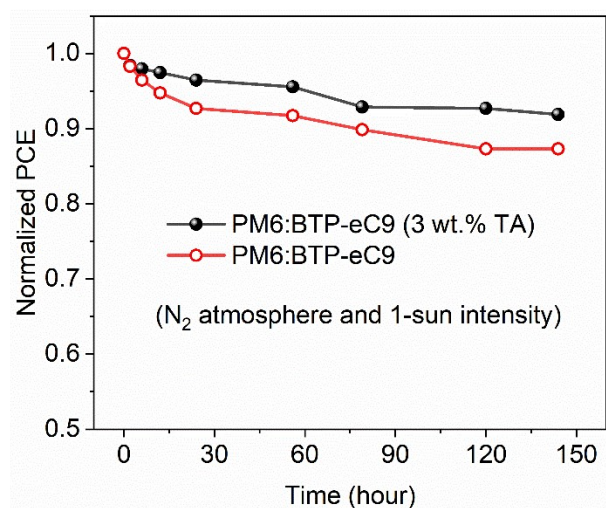

**Figure S38.** Normalized PCE of inverted devices of unencapsulated PM6:BTP-eC9 and 3 wt.% TA-doped PM6:BTP-eC9-based device in the glovebox with illumination of 1-sun simulator (100 mW cm<sup>-2</sup>).

**Table S1.** Summarized parameters of the neat films with or w/o TA ordered structures.

| Blend film             | $\pi$ - $\pi$ stacking (OOP) |                |                            |            | Lamellar stacking (IP)         |                              |                            |            |
|------------------------|------------------------------|----------------|----------------------------|------------|--------------------------------|------------------------------|----------------------------|------------|
|                        | $q_z$<br>[Å <sup>-1</sup> ]  | $d_\pi$<br>[Å] | FWHM<br>[Å <sup>-1</sup> ] | CCL<br>[Å] | $q_{xy}$<br>[Å <sup>-1</sup> ] | $d_{\text{lamellar}}$<br>[Å] | FWHM<br>[Å <sup>-1</sup> ] | CCL<br>[Å] |
| PM6                    | 1.676                        | 3.749          | 0.303                      | 19.29      | 0.292                          | 21.54                        | 0.090                      | 64.74      |
| D18-2F                 | 1.622                        | 3.875          | 0.296                      | 19.73      | 0.307                          | 20.45                        | 0.105                      | 55.85      |
| PM6:D18-2F (9:1)       | 1.655                        | 3.796          | 0.271                      | 21.56      | 0.300                          | 20.95                        | 0.089                      | 65.47      |
| BTP-eC9                | 1.688                        | 3.723          | 0.318                      | 18.39      | 0.385                          | 16.32                        | 0.149                      | 39.13      |
| PM6:D18-2F (3 wt.% TA) | 1.706                        | 3.683          | 0.273                      | 21.43      | 0.292                          | 21.53                        | 0.082                      | 71.50      |
| BTP-eC9 (3 wt.%TA)     | 1.751                        | 3.589          | 0.291                      | 20.06      | 0.385                          | 16.32                        | 0.134                      | 43.56      |

**Table S2.** Mechanical parameters of the of the neat films with or w/o TA obtained by AFM PFQNM, film on elastomer (FOE) and film on water (FOW) method.

| Donor | AFM PFQNM                |                    |                                       | Film on Elastomer                    | Film on Water          |
|-------|--------------------------|--------------------|---------------------------------------|--------------------------------------|------------------------|
|       | Elastic modulus<br>[GPa] | Stiffness<br>[N/m] | Compliance<br>[×10 <sup>-2</sup> m/N] | COS <sub>FOE</sub> [%] <sup>a)</sup> | COS <sub>FOW</sub> [%] |

|                |      |       |      |      |      |
|----------------|------|-------|------|------|------|
| PM6            | 2.98 | 23.45 | 4.26 | 17.5 | 9.3  |
| D18-2F         | 2.26 | 17.04 | 5.87 | /    | 13.5 |
| PM6:D18-2F     | 2.69 | 18.16 | 5.51 | /    | 11.7 |
| PM6:D18-2F(TA) | /    | /     | /    | /    | 14.3 |

<sup>a)</sup> COS<sub>FOE</sub> data of PM6 film comes from our previous work (Matter, 2022, 5, 1877–1889).

**Table S3.** The detailed photovoltaic parameters of PM6:BTP-eC9 based device with PEDOT:PSS (4083) as HTL.

| Active layer          | $V_{OC}$<br>[V] | $J_{SC}$<br>[mA/cm <sup>2</sup> ] | FF<br>[%] | PCE <sup>a)</sup><br>[%] | $R_s$<br>[ $\Omega$ cm <sup>2</sup> ] | $R_{sh} \times 10^3$<br>[ $\Omega$ cm <sup>2</sup> ] |
|-----------------------|-----------------|-----------------------------------|-----------|--------------------------|---------------------------------------|------------------------------------------------------|
| Binary<br>4083 as HTL | 0.849           | 28.00                             | 77.9      | 18.44 (18.13)            | 2.26                                  | 2.81                                                 |

PM6:BTP-eC9=1:1.2 (w:w) blend film as photovoltaic layer, PEDOT:PSS (4083) as hole transport layer (HTL);

**Table S4.** The detailed photovoltaic parameters of PM6:BTP-eC9 based device doped with different concentrations of TA.

| Active layer                | $V_{OC}$<br>[V] | $J_{SC}$<br>[mA/cm <sup>2</sup> ] | FF    | PCE<br>[%]    |
|-----------------------------|-----------------|-----------------------------------|-------|---------------|
| PM6:BTP-eC9                 | 0.851           | 28.58                             | 78.27 | 18.97 (18.75) |
| PM6:BTP-eC9 (1 wt. %<br>TA) | 0.855           | 28.53                             | 78.19 | 19.07 (18.86) |
| PM6:BTP-eC9 (3 wt.% TA)     | 0.858           | 28.73                             | 78.00 | 19.22 (19.03) |
| PM6:BTP-eC9 (5 wt.% TA)     | 0.853           | 28.48                             | 77.49 | 18.84 (18.52) |

PM6:BTP-eC9=1:1.2 (w:w) blend film as photovoltaic layer, 4PADCB SAM as hole transport layer (HTL).

**Table S5.** The detailed photovoltaic parameters of PM6:D18-2F:BTP-eC9-based devices by varying the blending ratio of D18-2F.

| Active layer | $V_{OC}$<br>[V] | $J_{SC}$<br>[mA/cm <sup>2</sup> ] | FF | PCE<br>[%] |
|--------------|-----------------|-----------------------------------|----|------------|
|--------------|-----------------|-----------------------------------|----|------------|

|                                       |       |       |       |               |
|---------------------------------------|-------|-------|-------|---------------|
| PM6:D18-2F:BTP-eC9<br>(1:0:1.2)       | 0.851 | 28.58 | 78.27 | 18.97 (18.75) |
| PM6:D18-2F:BTP-eC9<br>(0.95:0.05:1.2) | 0.855 | 28.63 | 77.96 | 19.08 (18.84) |
| PM6:D18-2F:BTP-eC9<br>(0.9:0.1:1.2)   | 0.858 | 28.82 | 78.43 | 19.39 (19.21) |
| PM6:D18-2F:BTP-eC9<br>(0.08:0.2:1.2)  | 0.862 | 28.08 | 78.13 | 18.91 (18.57) |

Donor: Acceptor=1:1.2 (w:w) blend film as photovoltaic layer, 4PADCB SAM as hole transport layer (HTL).

**Table S6.** Detailed parameters of binary and ternary devices for electron and hole mobilities.

| Active layer | Electron mobility<br>( $\times 10^{-4} \text{ cm}^2 \text{ V}^{-1} \text{ s}^{-1}$ ) | Hole mobility<br>( $\times 10^{-4} \text{ cm}^2 \text{ V}^{-1} \text{ s}^{-1}$ ) | $\mu_e/\mu_h$ |
|--------------|--------------------------------------------------------------------------------------|----------------------------------------------------------------------------------|---------------|
| Binary       | 5.95                                                                                 | 4.35                                                                             | 1.37          |
| Binary (TA)  | 7.63                                                                                 | 4.7                                                                              | 1.62          |
| Ternary (TA) | 10.9                                                                                 | 9.62                                                                             | 1.13          |

**Table S7.** Surface energy characteristics of the donor and acceptor pristine films.

| Surface      | $\theta_{\text{water}}$ | $\theta_{\text{CH}_2\text{I}_2}$ | $\gamma^d$<br>[mN m <sup>-1</sup> ] | $\gamma^p$<br>[mN m <sup>-1</sup> ] | $\gamma$<br>[mN m <sup>-1</sup> ] | $\chi^{\text{D-A a)}}$ | $\chi^{\text{D/PM6 b)}$ | $\omega_{\text{De)}$ |
|--------------|-------------------------|----------------------------------|-------------------------------------|-------------------------------------|-----------------------------------|------------------------|-------------------------|----------------------|
| PM6          | 102.825°                | 58.912°                          | 29.612                              | 0.166                               | 29.778                            | 0.406k                 | /                       | /                    |
| D18-2F       | 99.148°                 | 53.389°                          | 32.495                              | 0.313                               | 32.809                            | 0.134k                 | 0.073k                  | -0.150               |
| BTP-eC9      | 92.578°                 | 45.016°                          | 36.276                              | 0.865                               | 37.141                            | /                      | /                       | /                    |
| PM6 (TA)     | 100.469°                | 55.558°                          | 31.347                              | 0.260                               | 31.608                            | 0.223k                 | /                       | /                    |
| BTP-eC9 (TA) | 90.01°                  | 45.035°                          | 35.569                              | 1.433                               | 37.002                            | /                      | /                       | /                    |

a) The Flory-Huggins interaction parameter between the donor and acceptor is calculated through the equation of:  $\chi_{D/A} = \kappa(\sqrt{\gamma_A} - \sqrt{\gamma_D})^2$ .

b) The Flory-Huggins interaction parameter between the two acceptors (PM6 and D) is calculated through the equation of:  $\chi_{D/PM6} = \kappa(\sqrt{\gamma_D} - \sqrt{\gamma_{PM6}})^2$ .

c) The wetting coefficient ( $\omega$ ) of the third component D in the mixture of PM6:BTP-eC9 is calculated according to Young's

equation: 
$$\omega_D = \frac{\chi_{BTP-eC9/D} - \chi_{PM6/D}}{\chi_{PM6/BTP-eC9}}.$$

**Table S8.** Summarized parameters of the blend films with or w/o TA ordered structures.

| Blend film              | $\pi$ - $\pi$ stacking (OOP)   |                             |                               |                         | Lamellar stacking (IP)            |                                           |                               |                         |
|-------------------------|--------------------------------|-----------------------------|-------------------------------|-------------------------|-----------------------------------|-------------------------------------------|-------------------------------|-------------------------|
|                         | $q_z$<br>[ $\text{\AA}^{-1}$ ] | $d_\pi$<br>[ $\text{\AA}$ ] | FWHM<br>[ $\text{\AA}^{-1}$ ] | CCL<br>[ $\text{\AA}$ ] | $q_{xy}$<br>[ $\text{\AA}^{-1}$ ] | $d_{\text{lamellar}}$<br>[ $\text{\AA}$ ] | FWHM<br>[ $\text{\AA}^{-1}$ ] | CCL<br>[ $\text{\AA}$ ] |
| PM6:BTP-eC9             | 1.727                          | 3.639                       | 0.279                         | 20.94                   | 0.304                             | 20.69                                     | 0.153                         | 38.24                   |
| PM6:BTP-eC9 (TA)        | 1.721                          | 3.650                       | 0.249                         | 23.51                   | 0.308                             | 20.43                                     | 0.144                         | 40.45                   |
| PM6:D18-2F:BTP-eC9 (TA) | 1.711                          | 3.672                       | 0.249                         | 23.46                   | 0.304                             | 20.69                                     | 0.147                         | 39.81                   |

**Table S9.** Detailed parameters of binary and ternary devices for electron and hole mobilities.

|                         | COS <sub>FOV</sub> [%] | Highest stress [MPa] | Stiffness [N/m] |
|-------------------------|------------------------|----------------------|-----------------|
| PM6:BTP-eC9             | 3.63                   | 13.93                | 26.11           |
| PM6:BTP-eC9 (TA)        | 5.51                   | 32.50                | 22.35           |
| PM6:D18-2F:BTP-eC9 (TA) | 6.44                   | 39.28                | 18.19           |

**Table S10.** Comparisons of PCE values of plastic substrate-based flexible devices in the recent years.

| Year | Active layer                       | PCE (%) | Refer. |
|------|------------------------------------|---------|--------|
| 2019 | Front cell: PBDB-T:F-M             | 16.55   | 2      |
|      | Rear cell:                         |         |        |
|      | PTB7-Th:PC <sub>71</sub> BM:O6T-4F |         |        |
| 2020 | PM6:Y6                             | 15.20   | 3      |
| 2020 | PM6:Y6                             | 15.03   | 4      |
| 2020 | PM6:Y6                             | 15.12   | 5      |
| 2020 | PM6:Y6                             | 15.21   | 6      |
| 2020 | PM6:N3:PC <sub>71</sub> BM         | 16.10   | 7      |
| 2021 | D18-Cl:G19:Y6                      | 15.90   | 8      |
| 2021 | PM6:BTP-eC9                        | 16.00   | 9      |
| 2021 | PM6:Y6                             | 16.61   | 10     |
| 2022 | PM6:BTP-eC9                        | 16.71   | 11     |
| 2022 | PM6:BTP-eC9:PY-IT                  | 16.52   | 12     |
| 2022 | PM6:BTP-eC9:PC71BM                 | 17.50   | 13     |
| 2023 | PM6:L8-BO                          | 17.40   | 14     |
| 2023 | D18:N3:DOY-TVT                     | 18.06   | 15     |
| 2024 | D18:Y6:PC <sub>71</sub> BM         | 18.00   | 16     |
| 2024 | PM6:L8-BO                          | 18.05   | 17     |

## Supplemental References

1. J. Xue, H. Zhao, C. Zhao, L. Tang, Y. Wang, J. Xin, Z. Bi, K. Zhou and W. Ma, *Adv. Funct. Mater.*, 2023, **33**, 2303403.
2. Y. Sun, M. Chang, L. Meng, X. Wan, H. Gao, Y. Zhang, K. Zhao, Z. Sun, C. Li, S. Liu, H. Wang, J. Liang and Y. Chen, *Nature Electronics*, 2019, **2**, 513-520.
3. D. Koo, S. Jung, J. Seo, G. Jeong, Y. Choi, J. Lee, S. M. Lee, Y. Cho, M. Jeong, J. Lee, J. Oh, C. Yang and H. Park, *Joule*, 2020, **4**, 1021-1034.
4. F. Qin, W. Wang, L. Sun, X. Jiang, L. Hu, S. Xiong, T. Liu, X. Dong, J. Li, Y. Jiang, J. Hou, K. Fukuda, T. Someya and Y. Zhou, *Nat. Commun.*, 2020, **11**, 4508.
5. J. Kim, D. Ouyang, H. Lu, F. Ye, Y. Guo, N. Zhao and W. C. H. Choy, *Adv. Energy Mater.*, 2020, **10**, 1903919.
6. X. Chen, G. Xu, G. Zeng, H. Gu, H. Chen, H. Xu, H. Yao, Y. Li, J. Hou and Y. Li, *Adv. Mater.*, 2020, **32**, e1908478.
7. T. Y. Qu, L. J. Zuo, J. D. Chen, X. L. Shi, T. Zhang, L. Li, K. C. Shen, H. Ren, S. Wang, F. M. Xie, Y. Q. Li, A. K. Y. Jen and J. X. Tang, *Advanced Optical Materials*, 2020, **8**, 2000669.
8. Z. Chen, W. Song, K. Yu, J. Ge, J. Zhang, L. Xie, R. Peng and Z. Ge, *Joule*, 2021, **5**, 2395-2407.
9. X. Song, G. Liu, P. Sun, Y. Liu and W. Zhu, *J Phys Chem Lett*, 2021, **12**, 10616-10621.
10. J. Wan, Y. Xia, J. Fang, Z. Zhang, B. Xu, J. Wang, L. Ai, W. Song, K. N. Hui, X. Fan and Y. Li, *Nano-micro letters*, 2021, **13**, 44.
11. X. Liu, Z. Zheng, J. Wang, Y. Wang, B. Xu, S. Zhang and J. Hou, *Adv. Mater.*, 2022, **34**,

e2106453.

12. W. Song, K. Yu, J. Ge, L. Xie, R. Zhou, R. Peng, X. Zhang, M. Yang, Z. Wei and Z. Ge, *Matter*, 2022, **5**, 1877-1889.
13. G. Zeng, W. Chen, X. Chen, Y. Hu, Y. Chen, B. Zhang, H. Chen, W. Sun, Y. Shen, Y. Li, F. Yan and Y. Li, *J. Am. Chem. Soc.*, 2022, **144**, 8658-8668.
14. X. J. Zheng, L. J. Zuo, K. R. Yan, S. Q. Shan, T. Y. Chen, G. Y. Ding, B. W. Xu, X. Yang, J. H. Hou, M. M. Shi and H. Z. Chen, *Energy Environ. Sci.*, 2023, **16**, 2284-2294.
15. W. Song, Q. Ye, S. Yang, L. Xie, Y. Meng, Z. Chen, Q. Gu, D. Yang, J. Shi and Z. Ge, *Angew. Chem. Int. Ed. Engl.*, 2023, **62**, e202310034.
16. H. Ren, W.-S. Chen, J.-D. Chen, J.-P. Yang, Y.-F. Zhang, H.-Y. Hou, S. Tian, H.-R. Ge, Y.-Q. Li and J.-X. Tang, *Chem. Eng. J.*, 2024, **481**, 148498.
17. Z. Xiao, S. Li, J. Liu, X. Chen, Z. Suo, C. Li, X. Wan and Y. Chen, *Solar RRL*, 2024, DOI: 10.1002/solr.202400206, 2400206.
